# Supplementary material for: Impact of atmospheric water vapor on the thermal decomposition of calcium hydroxide: a universal kinetic approach to a physico-geometrical consecutive reaction in solid–gas systems under different partial pressures of product gas
Source: Royal Society of Chemistry journal article supplement (doi:10.1039/c9cp01327j), 2019-01-01
Supplement: c9cp01327j1.pdf [file c9cp01327j1.pdf]

# Impact of atmospheric water vapor on the thermal decomposition of calcium hydroxide: A universal kinetic approach to a physico-geometrical consecutive reaction in solid–gas systems under different partial pressures of product gas

Nobuyoshi Koga,<sup>1,\*</sup> Loic Favergeon,<sup>2</sup> and Satoki Kodani<sup>1</sup>

<sup>1</sup>Department of Science Education, Graduate School of Education, Hiroshima University, 1-1-1 Kagamiyama, Higashi-Hiroshima 739-8524, Japan

<sup>2</sup>Mines Saint-Etienne, University of Lyon, CNRS, UMR 5307 LGF, Centre SPIN, F-42023 Saint-Etienne, France

## Contents

|                                                                                                                                                                                                                                                                                                                                                                                                    |    |
|----------------------------------------------------------------------------------------------------------------------------------------------------------------------------------------------------------------------------------------------------------------------------------------------------------------------------------------------------------------------------------------------------|----|
| S1. Experimental setup and calibration of instruments .....                                                                                                                                                                                                                                                                                                                                        | s2 |
| <b>Figure S1.</b> An example of the TG measurement obtained for the Ca(OH) <sub>2</sub> sample ( $m_0 = 3.002$ mg) as recorded at $\beta = 5$ K min <sup>-1</sup> in a stream of wet N <sub>2</sub> gas (400 cm <sup>3</sup> min <sup>-1</sup> ) by controlling the relative humidity at 30% at 309.5 K. ....                                                                                      | s2 |
| S2. Sample characterization.....                                                                                                                                                                                                                                                                                                                                                                   | s3 |
| <b>Figure S2.</b> Typical TG–DTG curves for the Ca(OH) <sub>2</sub> sample ( $m_0 = 3.002$ mg) as recorded at $\beta = 5$ K min <sup>-1</sup> in a stream of wet N <sub>2</sub> gas (400 cm <sup>3</sup> min <sup>-1</sup> ) with $p(\text{H}_2\text{O}) = 1.81$ kPa. ....                                                                                                                         | s3 |
| S3. Kinetics of the induction period .....                                                                                                                                                                                                                                                                                                                                                         | s3 |
| <b>Figure S3.</b> Arrhenius-type plots for the IP of the thermal decomposition of Ca(OH) <sub>2</sub> at different temperatures under various $p(\text{H}_2\text{O})$ conditions: (a) conventional Arrhenius plot and (b) modified Arrhenius plot with the accommodation function of eqn (10).....                                                                                                 | s3 |
| <b>Figure S4.</b> Equilibrium water vapor pressure, $P_{\text{eq}}(T)$ , for the reversible reaction of eqn (6), together with the ( $T$ , $p(\text{H}_2\text{O})$ ) values for the mass-loss measurements under isothermal conditions. ....                                                                                                                                                       | s3 |
| <b>Table S1.</b> Kinetic parameters for the IP process, as determined according to the conventional Arrhenius plot based on eqn (8) and the modified Arrhenius plot based on eqn (11) with the accommodation function of eqn (10) ...                                                                                                                                                              | s4 |
| S4. Kinetics of the mass-loss process .....                                                                                                                                                                                                                                                                                                                                                        | s4 |
| <b>Figure S5.</b> Results of the conventional Friedman plots as applied to the mass-loss process of the thermal decomposition of Ca(OH) <sub>2</sub> under isothermal and linear nonisothermal conditions in various $p(\text{H}_2\text{O})$ conditions: (a) Friedman plots at $\alpha = 0.5$ and (b) $E_a$ values at different $\alpha$ . ....                                                    | s4 |
| <b>Figure S6.</b> Results of the modified Friedman plots with the accommodation function of eqn (10) as applied to the mass-loss process of the thermal decomposition of Ca(OH) <sub>2</sub> under isothermal and linear nonisothermal conditions in different $p(\text{H}_2\text{O})$ conditions: (a) modified Friedman plots at $\alpha = 0.5$ and (b) $E_a$ values at different $\alpha$ . .... | s4 |
| S5. Kinetic modeling of the consecutive IP–SR–PBR process under different water vapor pressures .....                                                                                                                                                                                                                                                                                              | s5 |
| <b>Table S2.</b> Kinetic equations for the IP–SR–PBR( $n$ ) model.....                                                                                                                                                                                                                                                                                                                             | s5 |
| <b>Table S3.</b> Optimized rate constants for the consecutive reaction steps of IP, SR, and PBR(2) for the isothermal decomposition of Ca(OH) <sub>2</sub> at different temperatures under different $p(\text{H}_2\text{O})$ conditions. ....                                                                                                                                                      | s5 |
| <b>Figure S7.</b> Conventional Arrhenius plots that describe the temperature dependences of the rate constants for the IP, SR, and PBR(2) steps in the thermal decomposition of Ca(OH) <sub>2</sub> under various $p(\text{H}_2\text{O})$ conditions: (a) IP, (b) SR, and (c) PBR(2). ....                                                                                                         | s6 |
| <b>Figure S8.</b> Modified Arrhenius plots with the accommodation function of eqn (10), which describe the temperature dependences of the corrected rate constants for the IP, SR, and PBR(2) steps in the thermal decomposition of Ca(OH) <sub>2</sub> under various $p(\text{H}_2\text{O})$ conditions: (a) IP, (b) SR, and (c) PBR(2). ....                                                     | s6 |
| <b>Table S4.</b> Arrhenius parameters for each reaction step under a particular $p(\text{H}_2\text{O})$ value, as determined according to a conventional Arrhenius plot based on eqn (24) and a modified Arrhenius plot based on eqn (25) with the accommodation function of eqn (10).....                                                                                                         | s7 |

\* Corresponding Author. Tel/Fax: + 81-82-424-7092, e-mail: nkoga@hiroshima-u.ac.jp

## S1. Experimental setup and calibration of instruments

A humidity control TG–DTA system (Thermoplus TG–DTA/HUM-1, Rigaku) was used for measuring the mass-loss curves for the thermal decomposition of  $\text{Ca}(\text{OH})_2$  under controlled  $p(\text{H}_2\text{O})$  conditions. The measurement system was composed of a TG–DTA instrument (TG-8120, Rigaku) with an electric furnace surrounded by a water circulating pipe, a humidity controller (HUM-1, Rigaku), and a water circulator with a temperature controller (F 25, Julabo).

The TG–DTA instrument was preliminarily calibrated in relation to mass changes and temperature. Calibration with respect to changes in mass was performed at room temperature by the addition/removal of a 10 mg standard weight to/from the sample holder. Subsequently, the accuracy of the mass-change values at high temperatures was confirmed by measuring mass changes associated with the thermal decomposition of a calcium oxalate monohydrate sample (>99.9985%, Alfa Aesar) at three different  $p(\text{H}_2\text{O})$  values, i.e., 0.65, 1.85, and 5.65 kPa.

Temperature calibration of the TG–DTA instrument was also carried out under the aforementioned  $p(\text{H}_2\text{O})$  values. The onset temperature of the DTA endothermic peak recorded for the melting of pure metals (In, Sn, Pb, Zn, Al, and Ag, >99.99%, Nilaco) was calibrated in reference to the melting point reported in literature. An empty platinum pan was used as a reference and a counterbalance for the TG–DTA measurements to avoid any possible absorption/desorption of water vapor on the reference.

Wet  $\text{N}_2$  gas with a controlled  $p(\text{H}_2\text{O})$  value was generated by mixing dry  $\text{N}_2$  gas and wet  $\text{N}_2$  gas produced by bubbling  $\text{N}_2$  in a water bath heated at a specific temperature within the range of 298–333 K while using a humidity controller (HUM-1, Rigaku). The mixed “wet” gas was transferred to the forefront of the furnace tube via a transfer tube that was 4 mm in inner diameter and 0.8 m in length, which was heated at a temperature within the range of 323–343 K. The relative humidity of the gas was measured in the temperature-controlled anterior chamber connected to the furnace tube. The relative humidity obtained from these measurements was used as the feedback signal for PID controls for the flow rates of dry  $\text{N}_2$  and wet  $\text{N}_2$  in order to control the  $p(\text{H}_2\text{O})$  of the mixed gas. Accordingly,  $p(\text{H}_2\text{O})$  was set to be a constant value within the range of 0.14–7.63 kPa as a function of the relative humidity and the temperature of the anterior chamber.

Figure S1 shows an example of the TG measurement for the  $\text{Ca}(\text{OH})_2$  sample under controlled  $p(\text{H}_2\text{O})$  conditions. Prior to set the sample in the instrument, the temperatures of the circulating water, the water bath in the humidity controller, and the transfer tube between the humidity controller and the

TG–DTA instrument were stabilized at predetermined values. After setting the control value of the relative humidity of the flowing gas to zero, dry  $\text{N}_2$  gas ( $400 \text{ cm}^3 \text{ min}^{-1}$ ) was introduced into the TG–DTA instrument from the front of the reaction tube via the humidity controller and the transfer tube. At the same time, a purge with dry  $\text{N}_2$  was also introduced from the back of the balance system and pushed toward the reaction tube at a rate of  $50 \text{ cm}^3 \text{ min}^{-1}$ . These gases were discharged from the gas line positioned at the end of the reaction tube near the joint part of the reaction tube and the balance system. The relative humidity of the flowing gas was continuously measured in the anterior chamber connected to the front of the reaction tube, together with the temperature of the anterior chamber, in order to calculate the  $p(\text{H}_2\text{O})$  value for the flowing gas. After the sample was placed in the TG–DTA instrument, it was heated to a predetermined temperature ( $T_1$ ) at  $\beta = 5 \text{ K min}^{-1}$  in a stream of dry  $\text{N}_2$  gas. As soon as the sample temperature reached the desired  $T_1$ , the relative humidity was switched to a programmed value ( $H_1$ ) for the TG measurement. The sample was kept at  $T_1$  for 30 min in order to ensure stability in the system. Subsequently, the sample was heated according to the temperature program of nonisothermal or isothermal measurement in a stream of wet  $\text{N}_2$  gas ( $400 \text{ cm}^3 \text{ min}^{-1}$ ) under the controlled  $p(\text{H}_2\text{O})$  conditions. After the temperature program for the TG measurement was completed, the relative humidity in the system was immediately switched to zero. The reaction tube was cooled at  $\beta = -10 \text{ K min}^{-1}$  in a stream of dry  $\text{N}_2$  gas ( $400 \text{ cm}^3 \text{ min}^{-1}$ ) in order to avoid possible condensation of water vapor.

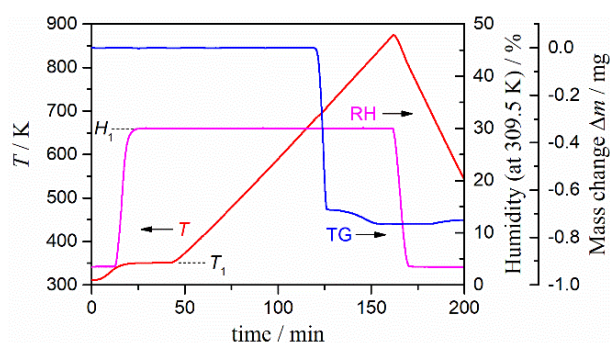

**Figure S1.** An example of the TG measurement obtained for the  $\text{Ca}(\text{OH})_2$  sample ( $m_0 = 3.002 \text{ mg}$ ) as recorded at  $\beta = 5 \text{ K min}^{-1}$  in a stream of wet  $\text{N}_2$  gas ( $400 \text{ cm}^3 \text{ min}^{-1}$ ) by controlling the relative humidity at 30% at 309.5 K.

## S2. Sample characterization

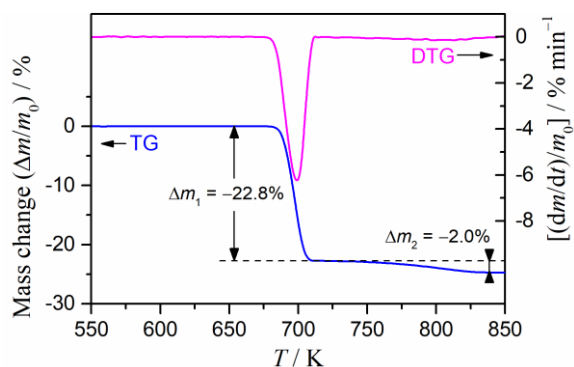

**Figure S2.** Typical TG–DTG curves for the  $\text{Ca}(\text{OH})_2$  sample ( $m_0 = 3.002$  mg) as recorded at  $\beta = 5$   $\text{K min}^{-1}$  in a stream of wet  $\text{N}_2$  gas ( $400$   $\text{cm}^3 \text{min}^{-1}$ ) with  $p(\text{H}_2\text{O}) = 1.81$  kPa.

## S3. Kinetics of the induction period

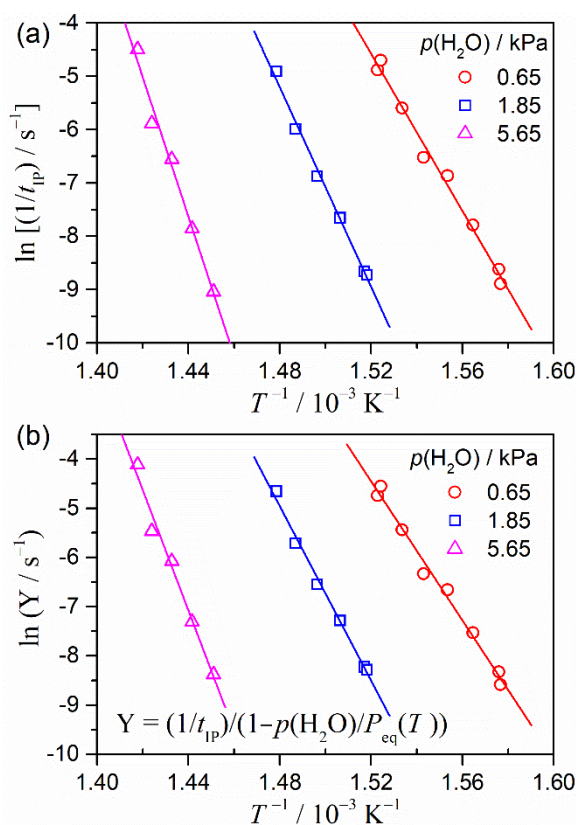

**Figure S3.** Arrhenius-type plots for the IP of the thermal decomposition of  $\text{Ca}(\text{OH})_2$  at different temperatures under various  $p(\text{H}_2\text{O})$  conditions: (a) conventional Arrhenius plot and (b) modified Arrhenius plot with the accommodation function of eqn (10).

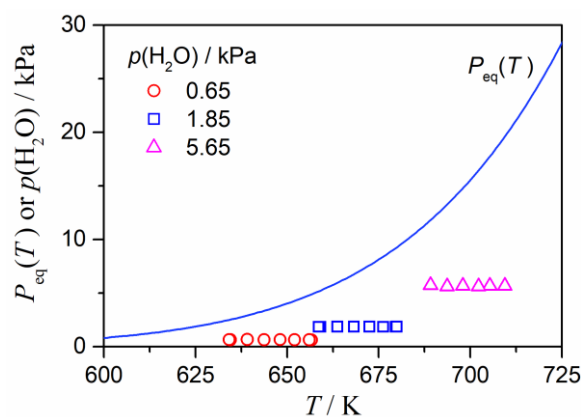

**Figure S4.** Equilibrium water vapor pressure,  $P_{\text{eq}}(T)$ , for the reversible reaction of eqn (6), together with the  $(T, p(\text{H}_2\text{O}))$  values for the mass-loss measurements under isothermal conditions.

**Table S1.** Kinetic parameters for the IP process, as determined according to the conventional Arrhenius plot based on eqn (8) and the modified Arrhenius plot based on eqn (11) with the accommodation function of eqn (10)

| Equation | $a(p(\text{H}_2\text{O}), P_{\text{eq}}(T))$ | $p(\text{H}_2\text{O}) / \text{kPa}$ | $E_{a,\text{IP}} / \text{kJ mol}^{-1}$ | $\ln[A_{\text{IP}}f(\alpha_{\text{IP}}) / \text{s}^{-1}]$ | $-\gamma^a$ |
|----------|----------------------------------------------|--------------------------------------|----------------------------------------|-----------------------------------------------------------|-------------|
| eqn (8)  | —                                            | $0.65 \pm 0.1$                       | $612.5 \pm 24.3$                       | $107.4 \pm 4.6$                                           | 0.9953      |
|          |                                              | $1.85 \pm 0.1$                       | $778.0 \pm 30.5$                       | $133.3 \pm 5.5$                                           | 0.9969      |
|          |                                              | $5.65 \pm 0.5$                       | $1085.6 \pm 78.7$                      | $180.4 \pm 13.6$                                          | 0.9922      |
| eqn (11) | eqn (10)                                     | $0.65 \pm 0.1$                       | $587.5 \pm 24.1$                       | $103.0 \pm 4.5$                                           | 0.9950      |
|          |                                              | $1.85 \pm 0.1$                       | $737.0 \pm 31.5$                       | $126.2 \pm 5.7$                                           | 0.9963      |
|          |                                              | $5.65 \pm 0.5$                       | $1016.9 \pm 80.6$                      | $169.1 \pm 13.9$                                          | 0.9907      |

<sup>a</sup> Correlation coefficient of the linear regression analysis.

#### S4. Kinetics of the mass-loss process

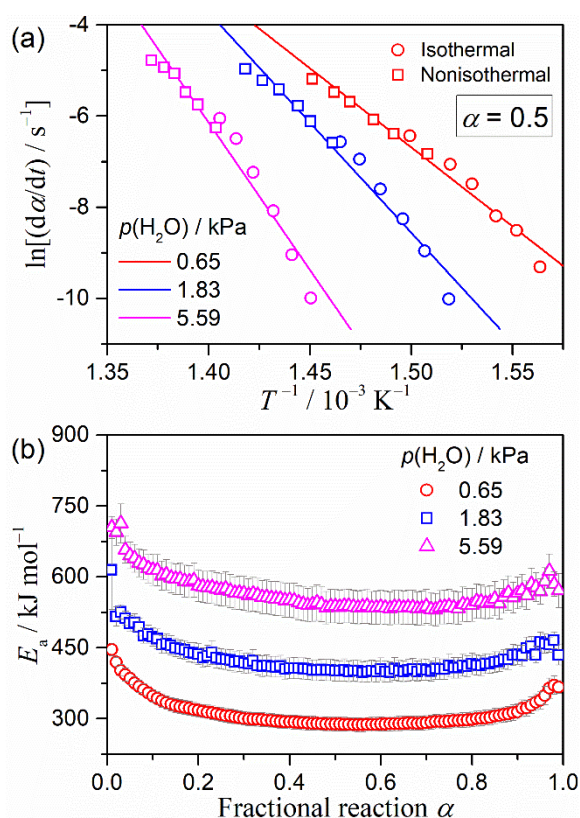

**Figure S5.** Results of the conventional Friedman plots as applied to the mass-loss process of the thermal decomposition of  $\text{Ca}(\text{OH})_2$  under isothermal and linear nonisothermal conditions in various  $p(\text{H}_2\text{O})$  conditions: (a) Friedman plots at  $\alpha = 0.5$  and (b)  $E_a$  values at different  $\alpha$ .

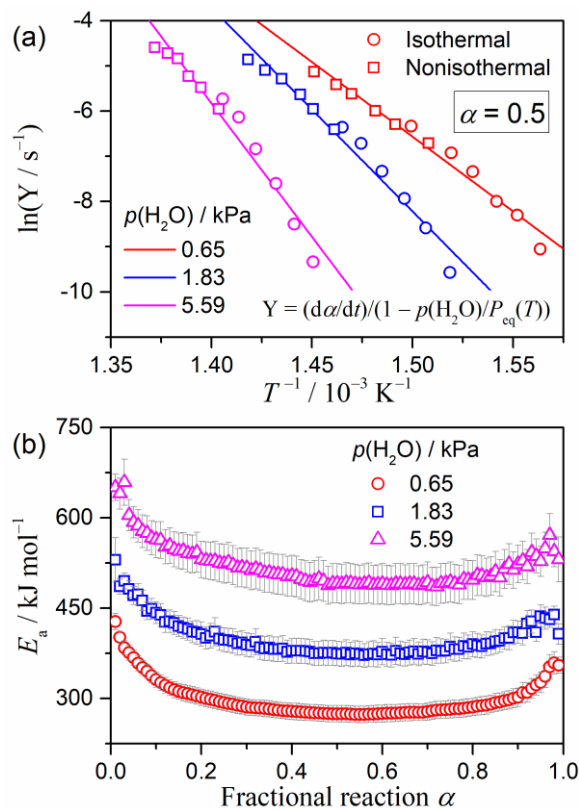

**Figure S6.** Results of the modified Friedman plots with the accommodation function of eqn (10) as applied to the mass-loss process of the thermal decomposition of  $\text{Ca}(\text{OH})_2$  under isothermal and linear nonisothermal conditions in different  $p(\text{H}_2\text{O})$  conditions: (a) modified Friedman plots at  $\alpha = 0.5$  and (b)  $E_a$  values at different  $\alpha$ .

## S5. Kinetic modeling of the consecutive IP–SR–PBR process under different water vapor pressures

**Table S2.** Kinetic equations for the IP–SR–PBR(*n*) model

| <i>n</i> | $\frac{d\alpha}{dt} =$                                                                                                                                                                                                                                                                                                                                                                                                                                                                                                                                                                                                                                                                                                                                                                     |
|----------|--------------------------------------------------------------------------------------------------------------------------------------------------------------------------------------------------------------------------------------------------------------------------------------------------------------------------------------------------------------------------------------------------------------------------------------------------------------------------------------------------------------------------------------------------------------------------------------------------------------------------------------------------------------------------------------------------------------------------------------------------------------------------------------------|
| 1        | <p>a) <math>t - t_{IP} \leq 1/k_{PBR(1)}</math>:</p> $k_{PBR(1)} \left[ 1 - \exp\left(-k_{SR} \left(t - \frac{1}{k_{IP}}\right)\right) \right]$ <p>b) <math>t - t_{IP} \geq 1/k_{PBR(1)}</math>:</p> $k_{PBR(1)} \exp\left(-k_{SR} \left(t - \frac{1}{k_{IP}}\right)\right) \left[ \exp\left(\frac{k_{SR}}{k_{PBR(1)}}\right) - 1 \right]$                                                                                                                                                                                                                                                                                                                                                                                                                                                 |
| 2        | <p>a) <math>t - t_{IP} \leq 1/k_{PBR(2)}</math>:</p> $-2k_{PBR(2)} \left[ \left(1 + \frac{k_{PBR(2)}}{k_{SR}}\right) \exp\left(-k_{SR} \left(t - \frac{1}{k_{IP}}\right)\right) + k_{PBR(2)} \left(t - \frac{1}{k_{IP}}\right) - \left(1 + \frac{k_{PBR(2)}}{k_{SR}}\right) \right]$ <p>b) <math>t - t_{IP} \geq 1/k_{PBR(2)}</math>:</p> $-2k_{PBR(2)} \exp\left(-k_{SR} \left(t - \frac{1}{k_{IP}}\right)\right) \left[ 1 + \frac{k_{PBR(2)}}{k_{SR}} - \frac{k_{PBR(2)}}{k_{SR}} \exp\left(\frac{k_{SR}}{k_{PBR(2)}}\right) \right]$                                                                                                                                                                                                                                                    |
| 3        | <p>a) <math>t - t_{IP} \leq 1/k_{PBR(3)}</math>:</p> $-3k_{PBR(3)} \left[ \left(1 + 2\frac{k_{PBR(3)}}{k_{SR}} + 2\left(\frac{k_{PBR(3)}}{k_{SR}}\right)^2\right) \exp\left(-k_{SR} \left(t - \frac{1}{k_{IP}}\right)\right) - \left(-k_{PBR(3)} \left(t - \frac{1}{k_{IP}}\right)\right)^2 + 2k_{PBR(3)} \left(\frac{k_{PBR(3)}}{k_{SR}} + 1\right) \left(t - \frac{1}{k_{IP}}\right) - \left(1 + 2\frac{k_{PBR(3)}}{k_{SR}} + 2\left(\frac{k_{PBR(3)}}{k_{SR}}\right)^2\right) \right]$ <p>b) <math>t - t_{IP} \geq 1/k_{PBR(3)}</math>:</p> $3k_{PBR(3)} \exp\left(-k_{SR} \left(t - \frac{1}{k_{IP}}\right)\right) \left[ 2\left(\frac{k_{PBR(3)}}{k_{SR}}\right)^2 \left(\exp\left(\frac{k_{SR}}{k_{PBR(3)}}\right) - 1\right) - \left(1 + 2\frac{k_{PBR(3)}}{k_{SR}}\right) \right]$ |

**Table S3.** Optimized rate constants for the consecutive reaction steps of IP, SR, and PBR(2) for the isothermal decomposition of Ca(OH)<sub>2</sub> at different temperatures under different *p*(H<sub>2</sub>O) conditions.

| <i>p</i> (H <sub>2</sub> O) / kPa | <i>T</i> / K | <i>k</i> <sub>IP</sub> / s <sup>-1</sup> | <i>k</i> <sub>SR</sub> / s <sup>-1</sup> | <i>k</i> <sub>PBR(2)</sub> / s <sup>-1</sup> | <i>r</i> <sup>2, a</sup> |          |
|-----------------------------------|--------------|------------------------------------------|------------------------------------------|----------------------------------------------|--------------------------|----------|
|                                   |              |                                          |                                          |                                              | differential             | integral |
| 0.65 ± 0.01                       | 634.5        | 1.38 × 10 <sup>-4</sup>                  | 1.16 × 10 <sup>-4</sup>                  | 3.46 × 10 <sup>-5</sup>                      | 0.9726                   | 0.9950   |
|                                   | 639.5        | 4.14 × 10 <sup>-4</sup>                  | 2.14 × 10 <sup>-4</sup>                  | 1.01 × 10 <sup>-4</sup>                      | 0.9985                   | 0.9998   |
|                                   | 644.1        | 1.04 × 10 <sup>-3</sup>                  | 5.37 × 10 <sup>-4</sup>                  | 2.24 × 10 <sup>-4</sup>                      | 0.9987                   | 0.9999   |
|                                   | 648.1        | 1.47 × 10 <sup>-3</sup>                  | 6.75 × 10 <sup>-3</sup>                  | 3.22 × 10 <sup>-4</sup>                      | 0.9981                   | 0.9999   |
|                                   | 653.1        | 3.70 × 10 <sup>-3</sup>                  | 1.39 × 10 <sup>-3</sup>                  | 7.06 × 10 <sup>-4</sup>                      | 0.9950                   | 0.9997   |
|                                   | 657.9        | 9.12 × 10 <sup>-3</sup>                  | 5.02 × 10 <sup>-3</sup>                  | 6.26 × 10 <sup>-4</sup>                      | 0.9968                   | 0.9998   |
|                                   | 1.85 ± 0.01  | 658.4                                    | 1.62 × 10 <sup>-4</sup>                  | 1.18 × 10 <sup>-4</sup>                      | 4.37 × 10 <sup>-5</sup>  | 0.9946   |
| 663.4                             |              | 4.72 × 10 <sup>-4</sup>                  | 2.74 × 10 <sup>-4</sup>                  | 1.15 × 10 <sup>-4</sup>                      | 0.9946                   | 0.9999   |
| 668.2                             |              | 1.04 × 10 <sup>-3</sup>                  | 6.01 × 10 <sup>-4</sup>                  | 2.79 × 10 <sup>-4</sup>                      | 0.9954                   | 0.9999   |
| 673.1                             |              | 2.49 × 10 <sup>-3</sup>                  | 1.21 × 10 <sup>-3</sup>                  | 5.92 × 10 <sup>-4</sup>                      | 0.9983                   | 0.9999   |
| 678.0                             |              | 7.40 × 10 <sup>-3</sup>                  | 3.01 × 10 <sup>-3</sup>                  | 7.69 × 10 <sup>-4</sup>                      | 0.9893                   | 0.9994   |
| 682.7                             |              | 3.70 × 10 <sup>-2</sup>                  | 4.88 × 10 <sup>-3</sup>                  | 1.23 × 10 <sup>-3</sup>                      | 0.9979                   | 0.9999   |
| 5.65 ± 0.04                       |              | 688.9                                    | 1.18 × 10 <sup>-4</sup>                  | 1.00 × 10 <sup>-4</sup>                      | 3.79 × 10 <sup>-5</sup>  | 0.9779   |
|                                   | 693.8        | 3.85 × 10 <sup>-4</sup>                  | 2.76 × 10 <sup>-4</sup>                  | 1.12 × 10 <sup>-4</sup>                      | 0.9924                   | 0.9997   |
|                                   | 698.5        | 1.42 × 10 <sup>-3</sup>                  | 7.27 × 10 <sup>-4</sup>                  | 3.20 × 10 <sup>-4</sup>                      | 0.9954                   | 0.9998   |
|                                   | 703.3        | 2.78 × 10 <sup>-3</sup>                  | 1.61 × 10 <sup>-3</sup>                  | 7.15 × 10 <sup>-4</sup>                      | 0.9904                   | 0.9993   |
|                                   | 707.5        | 6.21 × 10 <sup>-3</sup>                  | 4.74 × 10 <sup>-3</sup>                  | 1.28 × 10 <sup>-3</sup>                      | 0.9919                   | 0.9997   |
|                                   | 712.2        | 1.80 × 10 <sup>-2</sup>                  | 9.28 × 10 <sup>-3</sup>                  | 1.87 × 10 <sup>-3</sup>                      | 0.9901                   | 0.9996   |

<sup>a</sup> Determination coefficient of the nonlinear least-squares analysis.

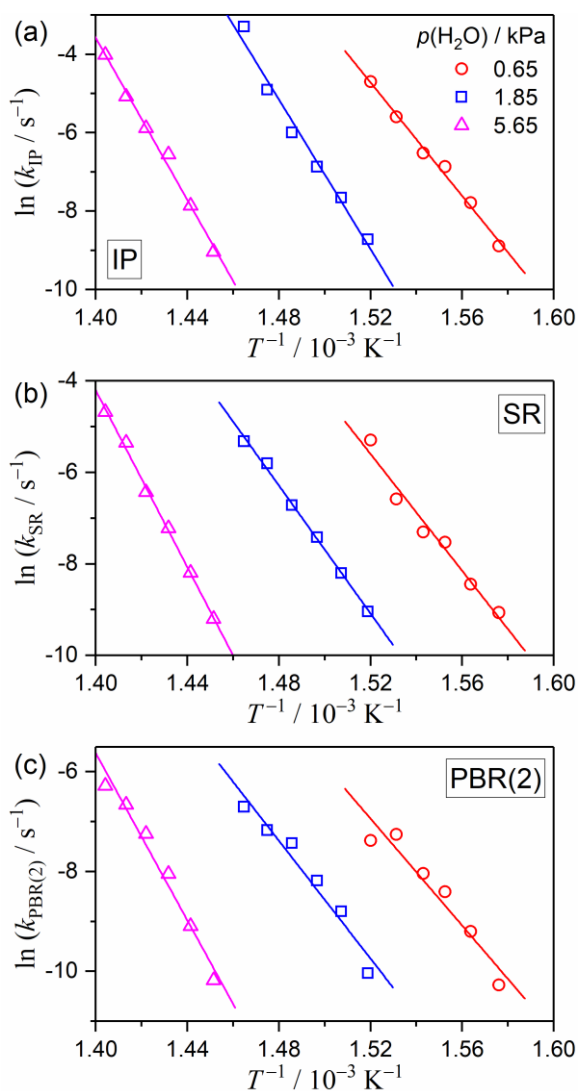

**Figure S7.** Conventional Arrhenius plots that describe the temperature dependences of the rate constants for the IP, SR, and PBR(2) steps in the thermal decomposition of  $\text{Ca}(\text{OH})_2$  under various  $p(\text{H}_2\text{O})$  conditions: (a) IP, (b) SR, and (c) PBR(2).

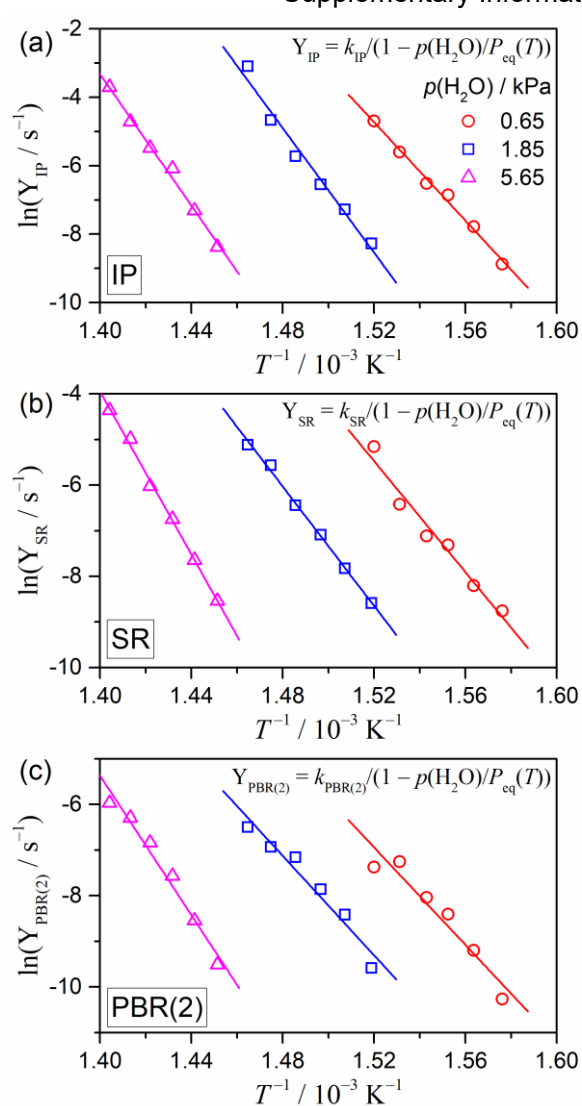

**Figure S8.** Modified Arrhenius plots with the accommodation function of eqn (10), which describe the temperature dependences of the corrected rate constants for the IP, SR, and PBR(2) steps in the thermal decomposition of  $\text{Ca}(\text{OH})_2$  under various  $p(\text{H}_2\text{O})$  conditions: (a) IP, (b) SR, and (c) PBR(2).

**Table S4.** Arrhenius parameters for each reaction step under a particular  $p(\text{H}_2\text{O})$  value, as determined according to a conventional Arrhenius plot based on eqn (24) and a modified Arrhenius plot based on eqn (25) with the accommodation function of eqn (10)

| Equation | $a(p(\text{H}_2\text{O}), P_{\text{eq}}(T))$ | Reaction step | $p(\text{H}_2\text{O}) / \text{kPa}$ | $E_a / \text{kJ mol}^{-1}$ | $\ln(A / \text{s}^{-1})$ | $-\gamma^a$ |
|----------|----------------------------------------------|---------------|--------------------------------------|----------------------------|--------------------------|-------------|
| eqn (24) | ————                                         | IP            | $0.65 \pm 0.1$                       | $600.2 \pm 26.4$           | $105.0 \pm 5.0$          | 0.9961      |
|          |                                              |               | $1.85 \pm 0.1$                       | $794.1 \pm 54.7$           | $136.2 \pm 9.9$          | 0.9906      |
|          |                                              |               | $5.65 \pm 0.5$                       | $859.5 \pm 37.8$           | $141.1 \pm 6.5$          | 0.9961      |
|          |                                              | SR            | $0.65 \pm 0.1$                       | $530.6 \pm 45.6$           | $91.4 \pm 8.5$           | 0.9855      |
|          |                                              |               | $1.85 \pm 0.1$                       | $581.5 \pm 15.7$           | $97.2 \pm 2.9$           | 0.9985      |
|          |                                              |               | $5.65 \pm 0.5$                       | $803.6 \pm 20.8$           | $131.1 \pm 3.6$          | 0.9986      |
|          |                                              | PBR(2)        | $0.65 \pm 0.1$                       | $445.1 \pm 62.0$           | $74.4 \pm 11.6$          | 0.9633      |
|          |                                              |               | $1.85 \pm 0.1$                       | $491.0 \pm 53.4$           | $80.0 \pm 9.6$           | 0.9771      |
|          |                                              |               | $5.65 \pm 0.5$                       | $696.6 \pm 54.6$           | $111.7 \pm 9.4$          | 0.9879      |
| eqn (25) | eqn (10)                                     | IP            | $0.65 \pm 0.1$                       | $597.8 \pm 26.2$           | $104.6 \pm 4.9$          | 0.9961      |
|          |                                              |               | $1.85 \pm 0.1$                       | $756.4 \pm 56.7$           | $129.8 \pm 10.2$         | 0.9889      |
|          |                                              |               | $5.65 \pm 0.5$                       | $799.0 \pm 35.3$           | $131.2 \pm 6.1$          | 0.9961      |
|          |                                              | SR            | $0.65 \pm 0.1$                       | $506.0 \pm 46.7$           | $87.0 \pm 8.7$           | 0.9834      |
|          |                                              |               | $1.85 \pm 0.1$                       | $543.8 \pm 14.9$           | $90.8 \pm 2.7$           | 0.9985      |
|          |                                              |               | $5.65 \pm 0.5$                       | $743.1 \pm 20.5$           | $121.2 \pm 3.5$          | 0.9985      |
|          |                                              | PBR(2)        | $0.65 \pm 0.1$                       | $444.1 \pm 61.8$           | $74.3 \pm 11.6$          | 0.9633      |
|          |                                              |               | $1.85 \pm 0.1$                       | $453.3 \pm 51.0$           | $73.6 \pm 9.2$           | 0.9756      |
|          |                                              |               | $5.65 \pm 0.5$                       | $636.1 \pm 50.0$           | $101.7 \pm 8.6$          | 0.9878      |

<sup>a</sup> Correlation coefficient of the linear regression analysis.
